# Supplementary material for: The Still Bay and Howiesons Poort at Sibudu and Blombos: Understanding Middle Stone Age Technologies
Source: PLOS journal article supplement (doi:10.1371/journal.pone.0131127), 2015-07-10
Supplement: S5 (10.1371/journal.pone.0131127.s005) [file journal.pone.0131127.s005]

# **The Still Bay and Howiesons Poort at Sibudu and Blombos: Understanding Middle Stone Age technologies**

Sylvain Soriano, Paola Villa, Anne Delagnes, Ilaria Degano, Luca Pollarolo,  
Jeannette J. Lucejko, Christopher Henshilwood, Lyn Wadley

## **Supporting Information**

### **S5 File**

(Tables A-J)

**Table A.** Frequencies of some attributes observed on the blade platforms in layers GS and GR. Attributes as in [1]. Statistically different frequencies (after a test of comparisons) are indicated in bold<sup>1</sup>.

|                                      | Layers                                            | GS          | GR          |
|--------------------------------------|---------------------------------------------------|-------------|-------------|
|                                      |                                                   | %           | %           |
| <i>Platform morphology</i>           |                                                   |             |             |
|                                      | Oval or narrow triangular                         | 50.6        | 48.3        |
|                                      | Narrow linear                                     | <b>14.5</b> | <b>23.8</b> |
|                                      | Curved                                            | 7.2         | 3.3         |
|                                      | Quadrangular or wide trapezoidal                  | 27.7        | 23.8        |
| <i>Platform preparation</i>          |                                                   |             |             |
|                                      | Plain                                             | 58.2        | 59.2        |
|                                      | Faceted platforms                                 | 23.0        | 21.1        |
|                                      | Spur                                              | 2.4         | 0.7         |
|                                      | Trimming of the edge on the exterior core surface | <b>51.9</b> | <b>40.7</b> |
|                                      | Abrasion of the edge of the platform              | 18.2        | 16.6        |
| <i>Bulb morphology</i>               |                                                   |             |             |
|                                      | Lipped, without a bulb                            | 32.3        | 34.0        |
|                                      | Prominent bulb with or without lipping            | 23.8        | 20.0        |
|                                      | Weakly developed bulb with or without lipping     | 30.5        | 28.0        |
| <i>Internal platform delineation</i> |                                                   |             |             |
|                                      | Regular straight or curved                        | <b>64.0</b> | <b>52.6</b> |
|                                      | Overhanging curved platform                       | 12.8        | 16.4        |
|                                      | Overhanging with bulb in clear relief             | 7.9         | 11.2        |
|                                      | Double curve with two impact points               | 0.6         | 1.3         |
|                                      | Irregular                                         | 14.0        | 18.4        |

<sup>1</sup> Preparation of platforms show minimal changes between layers GS and GR. There is a reduction of the trimming of the platform edge (GS: 51.9%, GR: 40.7%; test of equality of two proportions  $z = 1.98$ :  $\notin IP_{0.95}$ ,  $H_0$  rejected, proportions differ) and an increase of narrow linear platforms (GS: 14.5%, GR: 2.8%; test of equality of two proportions,  $z = 2.11$ :  $\notin IP_{0.95}$ ,  $H_0$  rejected, proportions differ). However frequencies for other morphologies are statistically equivalent. Frequency of edge abrasion and of faceted platforms are identical. The morphology of blade platforms is also stable. Changes in the internal platform delineation, considered as a proxy of the position of the hammer impact (marginal i.e. on margin of the striking platform or internal i.e. away from the margin), reflect minor modifications of knapping techniques. Frequency of straight or curved delineation of the internal edge is decreasing a little from GS to GR suggesting that bending initiation of the fracture [2] decrease as the percussion became less marginal. Nevertheless, the frequency of lipped platform without a bulb of percussion does not decrease as expected. The

exterior platform angle (Figure A in S4 File) records this minor change in the knapping gesture with differences between GS and GR. Higher angle values are better represented in the GR blades in agreement with a percussion set back from the edge of the striking platform, resulting in more open exterior platform angles. These changes are similar but minor compared to those observed in the late HP of Rose Cottage and Klasies.

**Table B.** Blanks used for backed pieces.

| <b>HP backed pieces</b>                            | <b>Blades<br/>%</b> | <b>Flakes<br/>%</b> |
|----------------------------------------------------|---------------------|---------------------|
| Sibudu (n = 199)                                   | 97.5                | 2.5                 |
| Rose Cottage (n = 53)                              | 96.2                | 3.8                 |
| Klasies Cave 1A, Singer and Wymer sample (n = 342) | 98.8                | 1.2                 |
| Klasies Cave 1A, Deacon's sample (n = 61)          | 95.1                | 4.9                 |

**Table C.** Frequencies of blades from the optimal phase of debitage (i.e. without cortex and from the central part of the debitage surface) used for backed pieces.

| <b>Blades from the optimal phase of debitage</b>   | <b>N</b> | <b>%</b> |
|----------------------------------------------------|----------|----------|
| Sibudu (n = 148)                                   | 136      | 91.9     |
| Rose Cottage (n = 42)                              | 24       | 57.1     |
| Klasies Cave 1A, Singer and Wymer sample (n = 309) | 279      | 90.3     |
| Klasies Cave 1A, Deacon's sample (n = 52)          | 36       | 69.2     |

**Table D.** Blanks used for all retouched pieces<sup>1</sup>

| <b>HP assemblages</b>                              | <b>Blades<br/>%</b> | <b>Flakes<br/>%</b> |
|----------------------------------------------------|---------------------|---------------------|
| Sibudu (n = 286)                                   | 87.8                | 12.2                |
| Rose Cottage (n = 94)                              | 90.4                | 9.6                 |
| Klasies Cave 1A, Singer and Wymer sample (n = 436) | 88.5                | 11.5                |
| Klasies Cave 1A, Deacon's sample (n = 155)         | 81.3                | 8.7                 |

<sup>1</sup>Indeterminate cases and very rare blanks such as chunks or slabs are excluded. Rose Cottage data is from layers EMD, MAS, ETH and SUZ only. Data for Klasies after [3]. Data for Sibudu include DRG.

**Table E.** Sibudu. Total of quartz backed pieces, including fragments, in the HP layers.

| Layers | Backed pieces,<br>all raw materials | Quartz backed<br>pieces |      |
|--------|-------------------------------------|-------------------------|------|
|        |                                     | N                       | %    |
| GR     | 75                                  | 4                       | 5.3  |
| GS     | 86                                  | 17                      | 19.8 |
| PGS    | 120                                 | 18                      | 15.0 |

**Table F.** Proportions of “hunting” tools and other tools in the HP and post-HP of Sibudu and Rose Cottage.

|                                     | Backed pieces    |      | Other tools |      |
|-------------------------------------|------------------|------|-------------|------|
|                                     | N                | %    | N           | %    |
| <b>Howiesons Poort</b>              |                  |      |             |      |
| Sibudu GS+GR (n = 233)              | 161              | 69.1 | 72          | 30.9 |
| Rose Cottage EMD+MAS<br>(n = 69)    | 43               | 62.3 | 26          | 37.7 |
|                                     |                  |      |             |      |
| <b>Post-HP</b>                      | Unifacial points |      | Other tools |      |
|                                     | N                | %    | N           | %    |
| Sibudu layer RSP (n = 344)          | 138              | 40.1 | 206         | 59.9 |
| Rose Cottage layer THO (n =<br>167) | 19               | 11.4 | 148         | 88.6 |

**Table G.** Sibudu HP. Mean width of blade, quartz excluded

| Layer  | N   | Mean<br>width<br>(mm) <sup>1</sup> |      |
|--------|-----|------------------------------------|------|
|        |     |                                    | SD   |
| GR     | 350 | 16.33                              | 5.51 |
| GR2    | 368 | 14.22                              | 4.90 |
| GS/GS2 | 414 | 13.57                              | 5.06 |

<sup>1</sup>Blades are of similar width in layers GS/GS2 (mean=13.57mm) and GR2 (mean=14.22 mm; Z-test:  $Z_0 = 1.83 < Z_{\alpha}$ , 5%, means are statistically similar) but comparison of mean width between layer GR2 and GR (mean=16.33 mm; Z-test:  $Z_0 = 5.41 > Z_{\alpha}$ , 5%, means are statistically different) argue for an increase of blade width.

**Table H.** Sibudu. Mean thickness and width of blade platforms for layer GS and GR, quartz excluded<sup>1</sup>.

|                |           | Layer GS |          |              | Layer GR |          |              |
|----------------|-----------|----------|----------|--------------|----------|----------|--------------|
| Blade platform |           | Dolerite | Hornfels | All raw mat. | Dolerite | Hornfels | All raw mat. |
| Thickness      | Mean (mm) | 3.71     | 3.04     | 3.45         | 4.15     | 3.02     | 3.9          |
|                | SD        | 1.48     | 1.53     | 1.52         | 2.03     | 1.99     | 2.05         |
| Width          | Mean (mm) | 9.85     | 8.25     | 9.28         | 11.06    | 9.02     | 10.65        |
|                | SD        | 3.63     | 3.6      | 3.76         | 4.34     | 4        | 4.26         |

<sup>1</sup>Platforms of blades from GS and GR are similar in thickness (Z-test:  $Z_0 = 1.34 < Z_{\alpha}$ , 5%,  $H_0$  validated) but differ slightly in width (GS mean = 9.28, GR mean = 10.65; Z-test:  $Z_0 = 3.70 > Z_{\alpha}$  5%, means are statistically different).

**Table I.** Frequency of impact scars of points of known function in Europe (arrowheads) and North America Paleoindian spear tips from Casper, Wyoming)<sup>1</sup>.

| Site, age and kinds of points                           | Type of site                 | No. of points suitable for analysis | No. of impact scars | % of impact scars |
|---------------------------------------------------------|------------------------------|-------------------------------------|---------------------|-------------------|
| Ommelshoved, about 13,000 BP, tanged points             | Residential                  | 88                                  | 11                  | 12.5              |
| Bromme, about 13,000 BP, tanged points                  | Residential                  | 47                                  | 3                   | 6.4               |
| Muldbjerg, about 2800 bc, transverse arrowheads         | Residential                  | 30                                  | 9                   | 30.0              |
| Præstelyng, about 3200 bc, transverse arrowheads        | Residential                  | 56                                  | 8                   | 14.3              |
| Vejlebro, level 8, about 3500 bc, transverse arrowheads | Residential                  | 24                                  | 5                   | 20.8              |
| Vejlebro, level 9, about 3500 bc, transverse arrowheads | Residential                  | 42                                  | 2                   | 4.8               |
| Stellmoor, upper level, about 12,000 BP, tanged points  | Reindeer kill site MNI = 302 | 45                                  | 19                  | 42.2              |
| Casper, 10 060 ± 170 BP with Hell Gap bifacial points   | Bison kill site MNI = 74     | 60                                  | 26                  | 43                |

<sup>1</sup>Modified after [4], references therein.

**Table J.** Frequencies of backed pieces in post-HP, late and final MSA assemblages.

| Site                                                                                                                       | Age <sup>1</sup><br>OSL dates<br>ka<br>(unless<br>specified)   | Retouched<br>pieces (except<br>backed)<br><br>N | Backed<br>pieces<br><br>N | Backed<br>pieces<br><br>% | Main tool forms                                                                                  |
|----------------------------------------------------------------------------------------------------------------------------|----------------------------------------------------------------|-------------------------------------------------|---------------------------|---------------------------|--------------------------------------------------------------------------------------------------|
| Sibudu, BM-BSP <sup>2</sup>                                                                                                | 58.5 ± 1.4<br>weighted<br>mean age                             | 551<br>(excluding<br>hammerstones)              | 4                         | 1.0                       | Unifacial points,<br>scrapers,<br>retouched and<br>utilized blades                               |
| Sibudu, late MSA,<br>layer RSp <sup>3</sup>                                                                                | 46.0 ± 1.9                                                     | 343                                             | 1                         | 0.3                       | Unifacial points,<br>scrapers, pièces<br>esquillées                                              |
| Sibudu, late and<br>final MSA, MOD-<br>CO                                                                                  | 49.4 ± 2.1<br>to 38.0 ±<br>2.6                                 | 377                                             | 15                        | 4.0                       | Unifacial and<br>bifacial points,<br>scrapers,<br>retouched flakes                               |
| Klasies River<br>Cave 1A, MSA III<br>Deacon's sample                                                                       | 57.9 ± 2.3                                                     | 103                                             | 0                         | 0                         | Scrapers, burins,<br>denticulates,<br>notches,<br>retouched and<br>utilized blades<br>and flakes |
| Rose Cottage,<br>post-HP layers,<br>Byr, Tho Ela, Lyn,<br>Kar                                                              | 56.0 ± 2.3<br>(sample<br>from layer<br>Lin)                    | 230                                             | 13                        | 5.3                       | Scrapers,<br>unifacial points,<br>retouched blades<br>and flakes                                 |
| Border Cave,<br>layers 2WA, 2BS<br>LowerA+B and<br>2BS UP (2BS<br>assemblages are<br>transitional to<br>ELSA) <sup>5</sup> | 60 ± 3<br>(ESR)<br>to<br>49-45<br>( <sup>14</sup> C cal<br>BP) | 67                                              | 3                         | 4.3                       | Unifacial points,<br>scrapers                                                                    |

<sup>1</sup>[5]. <sup>2</sup>[6]. <sup>3</sup>[7]. <sup>4</sup>The backed pieces of layers MOD to CO at Sibudu (include all final MSA layers LBMOD, Beach, Bu, Mou, Es, MC, Co) are all on flakes and have a very different morphology from the HP backed pieces. <sup>5</sup>[8].

## References

1. Soriano S, Villa P, Wadley L. Blade technology and tool forms in the Middle Stone Age of South Africa: the Howiesons Poort and post-Howiesons Poort at Rose Cottage Cave. *J Archaeol Sci.* 2007;34: 681–703.
2. Cotterell B, Kamminga J. The Formation of Flakes. *Am Antiq.* 1987;52: 675–708. doi:10.2307/281378
3. Villa P, Soriano S, Teyssandier N, Wurz S. The Howiesons Poort and MSA III at Klasies River main site, cave 1A. *J Archaeol Sci.* 2010;37: 630–655.
4. Villa P, Soressi M, Henshilwood CS, Mourre V. The Still Bay points of Blombos Cave (South Africa). *J Archaeol Sci.* 2009;36: 441–460.

5. Jacobs Z, Roberts RG, Galbraith RF, Deacon HJ, Grün R, Mackay A, et al. Ages for the Middle Stone Age of Southern Africa: Implications for Human Behavior and Dispersal. *Science*. 2008;322: 733–735.
6. Will M, Bader GD, Conard NJ. Characterizing the Late Pleistocene MSA Lithic Technology of Sibudu, KwaZulu-Natal, South Africa. *PLoS ONE*. 2014;9: e98359. doi:10.1371/journal.pone.0098359
7. Villa P, Delagnes A, Wadley L. A late Middle Stone Age artifact assemblage from Sibudu (KwaZulu-Natal) : comparisons with the European Middle Paleolithic. *J Archaeol Sci*. 2005;32: 399–422.
8. Villa P, Soriano S, Tsanova T, Degano I, Higham TF, d' Errico F, et al. Border Cave and the beginning of the Later Stone Age in South Africa. *Proc Natl Acad Sci U S A*. 2012;109: 13208–13213. doi:10.1073/pnas.1204213109
